# Supplementary material
Source: HighWire-hosted journal article supplement (https://cmaj.ca/highwire/filestream/57835/field_highwire_adjunct_files/0/abort-bern-appendix_1.pdf)
Supplement: abort-bern-appendix_1.pdf [file abort-bern-appendix_1.pdf]

## **Appendix 1: Questions asked in the survey of women in Peru about their experience with induced abortion**

**English translation** [original questions in Spanish follow]

### **Face-to-face interview**

*Administered in the absence of third parties by a trained interviewer*

- How old were you at your last birthday?
- What is the highest level of education you completed?
- What is your religion?
- What is your main occupation?
- What is your usual monthly income?
- What is your marital status?
- How many children have you had?
- Currently, how many of your children ever born are still alive?
- Are you or your main partner using now a method to avoid a pregnancy?
- Have you ever been pregnant?
- Have you ever had a pregnancy that ended in an abortion in the first three months of pregnancy?  
If so, how many?
- Did you ever have an abortion that was spontaneous in the first three months of pregnancy?  
If so, how many?
- Have you ever had a child that was stillborn (born dead) after the first three months of pregnancy?  
If so, how many?

### **Self-administered questionnaire**

*Administered by the respondent using a handheld computer in privacy*

- At what age did you first have sex?
- How many different people have you had sex with in your life?
- During the last 12 months, how many different people have you had sex with?
- Have you ever had a pregnancy that ended in an abortion in the first three months of pregnancy?  
If so, how many?
- Did you ever have an abortion that was spontaneous in the first three months of pregnancy?  
If so, how many?
- Questions about your last sexual partner:
  - When did you first have sex with this person? Please give date, or month and year, or at least year.
  - When did you last have sex with this person? Please give date, or month and year, or at least year.
  - Have you ever received money or gifts/favours in return for sex with this person?
- Questions about your second-to-last sexual partner:
  - When did you first have sex with this person? Please give date, or month and year, or at least year.
  - When did you last have sex with this person? Please give date, or month and year, or at least year.
  - Have you ever received money or gifts/favours in return for sex with this person?
- Questions about your third-to-last sexual partner:
  - When did you first have sex with this person? Please give date, or month and year, or at least year.
  - When did you last have sex with this person? Please give date, or month and year, or at least year.
  - Have you ever received money or gifts/favours in return for sex with this person?

*continued*

## **Original Spanish**

### **Cuestionario cara a cara:**

*Administrado por un personal entrenado y en la ausencia de terceras partes*

- ¿Cuántos años cumplió en su último cumpleaños?
- ¿Cuál es el último año o grado de estudio y nivel que aprobó?
- ¿A qué religión pertenece usted?
- ¿Cuál es su principal fuente de ingreso económico?
- ¿Cuál es su ingreso mensual?
- ¿Cuál es su estado civil?
- ¿Cuántos hijos ha tenido?
- En la actualidad, ¿cuántos de sus hijos que nacieron están vivos?
- Actualmente, ¿están usted y/o su pareja usando algún método para evitar embarazos?
- ¿Alguna vez ha estado embarazada?
- ¿Alguna vez ha tenido un embarazo que termino en aborto en los primeros tres meses de embarazo?  
Si es así, ¿cuántos fueron?
- ¿Alguna vez ha tenido un aborto espontáneo en los primeros tres meses de embarazo?  
Si es así, ¿cuántos fueron?
- ¿Alguna vez ha tenido un hijo que nació muerto con más de tres meses de embarazo?  
Si es así, ¿cuántos fueron?

### **Cuestionario auto-administrado (Self-administered questionnaire):**

Respondido por el participante usando una computadora de mano en privacidad.

- ¿A qué edad tuvo relaciones sexuales por primera vez?
- ¿Con cuántas personas diferentes ha tenido relaciones sexuales en toda su vida?
- En los últimos 12 meses, ¿con cuántas personas diferentes ha tenido relaciones sexuales?
- ¿Alguna vez ha tenido un embarazo que termino en aborto en los primeros tres meses de embarazo?  
Si es así, ¿cuántos fueron?
- ¿Alguna vez ha tenido un aborto espontáneo en los primeros tres meses de embarazo? Si es así, ¿cuántos fueron?
- Preguntas acerca de su última pareja sexual:
  - Aproximadamente, ¿hace cuanto tiempo tuvo relaciones sexuales por primera vez con esta persona?  
Si es posible, indicar la fecha, mes y año, o al menos año.
  - Aproximadamente, ¿hace cuanto tiempo tuvo relaciones sexuales por última vez con esta persona?  
Si es posible, indicar la fecha, mes y año, o al menos año.
  - ¿Esta persona le ha entregado dinero, regalos, o le ha hecho favores para que usted acepte tener relaciones sexuales con él?
- Preguntas acerca de su penúltima pareja sexual:
  - Aproximadamente, ¿hace cuanto tiempo tuvo relaciones sexuales por primera vez con esta persona?  
Si es posible, indicar la fecha, mes y año, o al menos año.
  - Aproximadamente, ¿hace cuanto tiempo tuvo relaciones sexuales por última vez con esta persona?  
Si es posible, indicar la fecha, mes y año, o al menos año.
  - ¿Esta persona le ha entregado dinero, regalos, o le ha hecho favores para que usted acepte tener relaciones sexuales con él?
- Preguntas acerca de su antepenúltima pareja sexual:
  - Aproximadamente, ¿hace cuanto tiempo tuvo relaciones sexuales por primera vez con esta persona?  
Si es posible, indicar la fecha, mes y año, o al menos año.
  - Aproximadamente, ¿hace cuanto tiempo tuvo relaciones sexuales por última vez con esta persona?  
Si es posible, indicar la fecha, mes y año, o al menos año.
  - ¿Esta persona le ha entregado dinero, regalos, o le ha hecho favores para que usted acepte tener relaciones sexuales con él?
